# Supplementary material for: Combining multiple sources of relationships in a network to advance understanding of physicians' beliefs regarding peer-effects
Source: Research Square preprint supplement (doi:10.21203/rs.3.rs-5027248/v1), 2024-10-08
Supplement: Supplementary file 1 [file 073f14c08a42df0cc94e3119.pdf]

## Appendix A

### A.1 Analysis of unweighted centrality measures versus weighted centrality measures

As mentioned in Section 3.2.2, in addition to models that used the weighted network measures (i.e.  $z_i$  in model (9)), we also estimated model (9) on the survey responses for each of the five survey questions and using unweighted centrality measures derived from the patient-sharing network at various thresholds (1-3). The reduced definitions of binary measures used, including *degree*, *betweenness* and *eigenvector*, corresponding to the weighted measures described in Section 3.2.2 are specified in Table A2.

Among the models in Table A1, only strength was significantly associated with the responses for the fifth survey question ( $est = 1.538$ ,  $p = 0.060$ ) at the border line. By incorporating tie weights, weighted measures of prominence can explain more variation in relation to the outcomes compared with the binary measures.

**Table A1** Comparison between fitted models with network measures derived from the unweighted networks with thresholds from 1 to 3 and original weighted network

| Question 1              | Threshold 1 <sup>a</sup> |       |                | Threshold 2 <sup>a</sup> |       |                |
|-------------------------|--------------------------|-------|----------------|--------------------------|-------|----------------|
|                         | Estimate                 | SE    | <i>p</i> value | Estimate                 | SE    | <i>p</i> value |
| Nominated               | 1.673                    | 1.102 | 0.129          | 1.764                    | 1.107 | 0.111          |
| NominationSum           | 0.067                    | 0.065 | 0.299          | 0.067                    | 0.067 | 0.318          |
| Degree                  | -0.217                   | 0.354 | 0.541          | -0.328                   | 0.363 | 0.366          |
| Eigenvector(unweighted) | -0.058                   | 0.257 | 0.822          | 0.253                    | 0.341 | 0.457          |
| Betweenness(unweighted) | 0.546                    | 0.735 | 0.457          | 1.300                    | 1.491 | 0.383          |
| Fellowship              | -0.115                   | 1.222 | 0.925          | -0.501                   | 1.295 | 0.699          |
| StartPractice35         | 0.724                    | 0.893 | 0.417          | 0.761                    | 0.884 | 0.389          |
| Age                     | -0.019                   | 0.042 | 0.647          | -0.014                   | 0.041 | 0.728          |
| Sex                     | -0.091                   | 0.618 | 0.883          | -0.186                   | 0.622 | 0.765          |
| RaceWhite               | -0.208                   | 0.675 | 0.758          | -0.255                   | 0.685 | 0.710          |
| RaceOthers              | 0.100                    | 0.941 | 0.915          | 0.079                    | 0.913 | 0.931          |

<sup>a</sup>For all the models, the variance of the hospital affiliation random effects was estimated to be 0.

**Table A1** (Continued) Comparison between fitted models with network measures derived from the unweighted networks with thresholds from 1 to 3 and original weighted network

| Question 1                       | Threshold 3 <sup>a</sup> |       |                | Original Weighted Network <sup>a</sup> |       |                |
|----------------------------------|--------------------------|-------|----------------|----------------------------------------|-------|----------------|
|                                  | Estimate                 | SE    | <i>p</i> value | Estimate                               | SE    | <i>p</i> value |
| Nominated                        | 1.721                    | 1.104 | 0.119          | 1.558                                  | 1.117 | 0.163          |
| NominationSum                    | 0.064                    | 0.067 | 0.336          | 0.064                                  | 0.065 | 0.328          |
| Degree/Strength                  | -0.326                   | 0.387 | 0.400          | -0.007                                 | 0.368 | 0.986          |
| Eigenvector(unweighted/weighted) | 0.290                    | 0.349 | 0.406          | -0.439                                 | 0.321 | 0.172          |
| Betweenness(unweighted/weighted) | 2.133                    | 2.115 | 0.313          | 0.471                                  | 0.562 | 0.402          |
| Fellowship                       | -0.389                   | 1.275 | 0.760          | -0.067                                 | 1.227 | 0.956          |
| StartPractice35                  | 0.665                    | 0.889 | 0.454          | 0.813                                  | 0.966 | 0.400          |
| Age                              | -0.017                   | 0.042 | 0.681          | -0.019                                 | 0.044 | 0.668          |
| Sex                              | -0.165                   | 0.620 | 0.790          | -0.013                                 | 0.640 | 0.984          |
| RaceWhite                        | -0.280                   | 0.684 | 0.683          | -0.291                                 | 0.676 | 0.667          |
| RaceOthers                       | 0.061                    | 0.911 | 0.947          | -0.155                                 | 0.921 | 0.866          |

  

| Question 2              | Threshold 1 <sup>a</sup> |       |                | Threshold 2 <sup>a</sup> |       |                |
|-------------------------|--------------------------|-------|----------------|--------------------------|-------|----------------|
|                         | Estimate                 | SE    | <i>p</i> value | Estimate                 | SE    | <i>p</i> value |
| Nominated               | 1.489                    | 0.657 | 0.024          | 1.495                    | 0.657 | 0.023          |
| NominationSum           | 0.028                    | 0.046 | 0.543          | 0.029                    | 0.046 | 0.531          |
| Degree                  | -0.272                   | 0.269 | 0.312          | 0.017                    | 0.270 | 0.950          |
| Eigenvector(unweighted) | 0.250                    | 0.230 | 0.278          | -0.234                   | 0.223 | 0.295          |
| Betweenness(unweighted) | 0.427                    | 0.496 | 0.389          | 0.132                    | 0.494 | 0.789          |
| Fellowship              | -0.346                   | 0.843 | 0.681          | -0.340                   | 0.881 | 0.699          |
| StartPractice35         | 0.088                    | 0.615 | 0.886          | -0.045                   | 0.604 | 0.941          |
| Age                     | -0.051                   | 0.031 | 0.104          | -0.055                   | 0.031 | 0.082          |
| Sex                     | 0.780                    | 0.465 | 0.093          | 0.800                    | 0.466 | 0.086          |
| RaceWhite               | -0.416                   | 0.509 | 0.413          | -0.300                   | 0.510 | 0.556          |
| RaceOthers              | 0.117                    | 0.727 | 0.872          | 0.220                    | 0.702 | 0.754          |

  

| Question 2                       | Threshold 3 <sup>a</sup> |       |                | Original Weighted Network <sup>a</sup> |       |                |
|----------------------------------|--------------------------|-------|----------------|----------------------------------------|-------|----------------|
|                                  | Estimate                 | SE    | <i>p</i> value | Estimate                               | SE    | <i>p</i> value |
| Nominated                        | 1.452                    | 0.654 | 0.026          | 1.491                                  | 0.680 | 0.028          |
| NominationSum                    | 0.028                    | 0.046 | 0.547          | 0.033                                  | 0.047 | 0.484          |
| Degree/Strength                  | 0.039                    | 0.278 | 0.889          | -0.214                                 | 0.270 | 0.429          |
| Eigenvector(unweighted/weighted) | -0.252                   | 0.233 | 0.279          | -0.991                                 | 0.830 | 0.233          |
| Betweenness(unweighted/weighted) | -0.103                   | 0.484 | 0.832          | 0.431                                  | 0.389 | 0.268          |
| Fellowship                       | -0.242                   | 0.871 | 0.781          | -0.519                                 | 0.868 | 0.550          |
| StartPractice35                  | -0.013                   | 0.610 | 0.983          | 0.246                                  | 0.668 | 0.713          |
| Age                              | -0.057                   | 0.032 | 0.072          | -0.057                                 | 0.032 | 0.075          |
| Sex                              | 0.830                    | 0.466 | 0.075          | 0.846                                  | 0.474 | 0.074          |
| RaceWhite                        | -0.263                   | 0.513 | 0.608          | -0.419                                 | 0.512 | 0.414          |
| RaceOthers                       | 0.191                    | 0.700 | 0.785          | 0.092                                  | 0.711 | 0.897          |

<sup>a</sup>For all the models, the variance of the hospital affiliation random effects was estimated to be 0.

**Table A1** (Continued) Comparison between fitted models with network measures derived from the unweighted networks with thresholds from 1 to 3 and original weighted network

| Question 3              | Threshold 1 <sup>a</sup> |       |                | Threshold 2 <sup>a</sup> |       |                |
|-------------------------|--------------------------|-------|----------------|--------------------------|-------|----------------|
|                         | Estimate                 | SE    | <i>p</i> value | Estimate                 | SE    | <i>p</i> value |
| Nominated               | 0.750                    | 0.982 | 0.445          | 0.676                    | 0.966 | 0.484          |
| NominationSum           | 0.221                    | 0.102 | 0.031          | 0.216                    | 0.099 | 0.028          |
| Degree                  | -0.066                   | 0.466 | 0.887          | -0.019                   | 0.465 | 0.968          |
| Eigenvector(unweighted) | 0.846                    | 1.078 | 0.433          | -0.021                   | 0.366 | 0.953          |
| Betweenness(unweighted) | -0.663                   | 0.664 | 0.318          | 0.111                    | 0.722 | 0.878          |
| Fellowship              | -1.357                   | 1.153 | 0.239          | -1.527                   | 1.222 | 0.211          |
| StartPractice35         | 1.205                    | 1.073 | 0.262          | 0.706                    | 1.003 | 0.481          |
| Age                     | -0.057                   | 0.051 | 0.263          | -0.046                   | 0.051 | 0.360          |
| Sex                     | 0.054                    | 0.823 | 0.947          | -0.126                   | 0.795 | 0.874          |
| RaceWhite               | -0.996                   | 0.884 | 0.260          | -0.963                   | 0.853 | 0.259          |
| RaceOthers              | -0.214                   | 1.269 | 0.866          | 0.041                    | 1.268 | 0.974          |

  

| Question 3                       | Threshold 3 <sup>a</sup> |       |                | Original Weighted Network <sup>a</sup> |       |                |
|----------------------------------|--------------------------|-------|----------------|----------------------------------------|-------|----------------|
|                                  | Estimate                 | SE    | <i>p</i> value | Estimate                               | SE    | <i>p</i> value |
| Nominated                        | 0.674                    | 0.963 | 0.484          | 0.856                                  | 1.027 | 0.404          |
| NominationSum                    | 0.215                    | 0.098 | 0.029          | 0.209                                  | 0.105 | 0.046          |
| Degree/Strength                  | 0.020                    | 0.481 | 0.967          | 0.123                                  | 0.469 | 0.793          |
| Eigenvector(unweighted/weighted) | -0.039                   | 0.384 | 0.918          | -0.258                                 | 0.311 | 0.407          |
| Betweenness(unweighted/weighted) | 0.047                    | 0.717 | 0.947          | -0.559                                 | 0.471 | 0.236          |
| Fellowship                       | -1.493                   | 1.216 | 0.220          | -1.626                                 | 1.170 | 0.164          |
| StartPractice35                  | 0.699                    | 1.028 | 0.497          | 1.169                                  | 1.196 | 0.328          |
| Age                              | -0.047                   | 0.050 | 0.357          | -0.061                                 | 0.051 | 0.230          |
| Sex                              | -0.122                   | 0.795 | 0.878          | 0.114                                  | 0.810 | 0.889          |
| RaceWhite                        | -0.968                   | 0.855 | 0.258          | -1.015                                 | 0.888 | 0.253          |
| RaceOthers                       | 0.031                    | 1.265 | 0.981          | -0.259                                 | 1.267 | 0.838          |

  

| Question 4              | Threshold 1 <sup>a</sup> |       |                | Threshold 2 <sup>a</sup> |       |                |
|-------------------------|--------------------------|-------|----------------|--------------------------|-------|----------------|
|                         | Estimate                 | SE    | <i>p</i> value | Estimate                 | SE    | <i>p</i> value |
| Nominated               | 0.561                    | 0.662 | 0.397          | 0.572                    | 0.676 | 0.397          |
| NominationSum           | 0.030                    | 0.060 | 0.624          | 0.050                    | 0.063 | 0.428          |
| Degree                  | -0.106                   | 0.307 | 0.730          | -0.408                   | 0.347 | 0.239          |
| Eigenvector(unweighted) | 0.339                    | 0.354 | 0.339          | 0.100                    | 0.258 | 0.698          |
| Betweenness(unweighted) | -0.221                   | 0.543 | 0.685          | 1.762                    | 1.466 | 0.229          |
| Fellowship              | -0.909                   | 0.997 | 0.362          | -1.464                   | 1.101 | 0.183          |
| StartPractice35         | 1.883                    | 1.178 | 0.110          | 1.449                    | 1.139 | 0.203          |
| Age                     | 0.043                    | 0.043 | 0.316          | 0.053                    | 0.044 | 0.223          |
| Sex                     | 0.366                    | 0.562 | 0.515          | 0.250                    | 0.553 | 0.652          |
| RaceWhite               | -0.431                   | 0.597 | 0.471          | -0.305                   | 0.607 | 0.616          |
| RaceOthers              | 0.755                    | 1.163 | 0.516          | 1.185                    | 1.152 | 0.304          |

<sup>a</sup>For all the models, the variance of the hospital affiliation random effects was estimated to be 0.

**Table A1** (Continued) Comparison between fitted models with network measures derived from the unweighted networks with thresholds from 1 to 3 and original weighted network

| Question 4                       | Threshold 3 <sup>a</sup> |       |                | Original Weighted Network <sup>a</sup> |       |                |
|----------------------------------|--------------------------|-------|----------------|----------------------------------------|-------|----------------|
|                                  | Estimate                 | SE    | <i>p</i> value | Estimate                               | SE    | <i>p</i> value |
| Nominated                        | 0.469                    | 0.675 | 0.487          | 0.701                                  | 0.681 | 0.303          |
| NominationSum                    | 0.045                    | 0.062 | 0.473          | 0.031                                  | 0.062 | 0.617          |
| Degree/Strength                  | -0.451                   | 0.356 | 0.204          | -0.175                                 | 0.317 | 0.580          |
| Eigenvector(unweighted/weighted) | 0.196                    | 0.265 | 0.459          | 0.300                                  | 0.531 | 0.572          |
| Betweenness(unweighted/weighted) | 1.323                    | 1.342 | 0.324          | -0.231                                 | 0.384 | 0.548          |
| Fellowship                       | -1.396                   | 1.072 | 0.193          | -0.961                                 | 1.002 | 0.337          |
| StartPractice35                  | 1.484                    | 1.142 | 0.194          | 1.860                                  | 1.184 | 0.116          |
| Age                              | 0.048                    | 0.043 | 0.262          | 0.039                                  | 0.044 | 0.370          |
| Sex                              | 0.285                    | 0.551 | 0.605          | 0.216                                  | 0.554 | 0.697          |
| RaceWhite                        | -0.392                   | 0.597 | 0.511          | -0.359                                 | 0.587 | 0.540          |
| RaceOthers                       | 1.064                    | 1.145 | 0.353          | 0.907                                  | 1.138 | 0.425          |

  

| Question 5 <sup>b</sup>              | Threshold 1 <sup>a</sup> |       |                | Threshold 2 <sup>a</sup> |       |                |
|--------------------------------------|--------------------------|-------|----------------|--------------------------|-------|----------------|
|                                      | Estimate                 | SE    | <i>p</i> value | Estimate                 | SE    | <i>p</i> value |
| Nominated                            | -0.569                   | 1.025 | 0.579          | -0.301                   | 1.022 | 0.768          |
| NominationSum                        | 0.064                    | 0.115 | 0.580          | 0.065                    | 0.114 | 0.569          |
| Degree                               | 0.725                    | 0.706 | 0.304          | 0.488                    | 0.608 | 0.422          |
| Eigenvector(unweighted) <sup>c</sup> | 0.598                    | 1.072 | 0.577          |                          |       |                |
| Betweenness(unweighted)              | -1.063                   | 0.880 | 0.227          | 4.616                    | 5.779 | 0.424          |
| StartPractice35                      | -0.078                   | 1.362 | 0.954          | -0.685                   | 1.349 | 0.612          |
| Age                                  | 0.111                    | 0.077 | 0.149          | 0.126                    | 0.077 | 0.103          |
| Sex                                  | -0.089                   | 1.031 | 0.931          | -0.325                   | 1.012 | 0.748          |
| RaceWhite <sup>d</sup>               | -1.793                   | 1.056 | 0.090          | -1.821                   | 0.999 | 0.068          |

  

| Question 5 <sup>b</sup>                       | Threshold 3 <sup>a</sup> |       |                | Original weighted network <sup>a</sup> |       |                |
|-----------------------------------------------|--------------------------|-------|----------------|----------------------------------------|-------|----------------|
|                                               | Estimate                 | SE    | <i>p</i> value | Estimate                               | SE    | <i>p</i> value |
| Nominated                                     | -0.503                   | 1.048 | 0.631          | -0.972                                 | 1.177 | 0.409          |
| NominationSum                                 | 0.041                    | 0.106 | 0.696          | -0.028                                 | 0.122 | 0.817          |
| Degree/Strength                               | 0.607                    | 0.674 | 0.367          | 1.538                                  | 0.817 | 0.060          |
| Eigenvector(unweighted/weighted) <sup>c</sup> |                          |       |                | -0.409                                 | 0.667 | 0.540          |
| Betweenness(unweighted/weighted)              | 9.515                    | 6.992 | 0.174          | -0.977                                 | 0.639 | 0.126          |
| StartPractice35                               | -1.289                   | 1.407 | 0.360          | -0.494                                 | 1.631 | 0.762          |
| Age                                           | 0.133                    | 0.079 | 0.094          | 0.144                                  | 0.087 | 0.097          |
| Sex                                           | -0.065                   | 1.019 | 0.949          | 0.206                                  | 1.058 | 0.846          |
| RaceWhite <sup>d</sup>                        | -1.899                   | 1.022 | 0.063          | -2.002                                 | 1.184 | 0.091          |

<sup>a</sup>For all the models, the variance of the hospital affiliation random effects was estimated to be 0.

<sup>b</sup>Because 0 out of 12 physicians who completed a fellowship chose either Neutral/Disagree/Completely Disagree in the dataset on which the models for Question 5 was estimated, we excluded the *Fellowship* variable from these models.

<sup>c</sup>Because big coefficients of *Eigenvector* centrality in models using network measures from unweighted networks with thresholds of 2 and 3 were observed, we excluded this variable and this suggests that weighted network measures produced more stable results.

<sup>d</sup>Because 0 out of 16 physicians in the Other Race group chose either Neutral/Disagree/Completely Disagree in the dataset on which the models for Question 5 were estimated, we combined Asian Race group with the Other Race group in these models.

**Table A2** Unweighted Centrality Measures

| Centrality Measures    | Mathematical Notation                                                                                                                                                                                                                                                                                                  |
|------------------------|------------------------------------------------------------------------------------------------------------------------------------------------------------------------------------------------------------------------------------------------------------------------------------------------------------------------|
| Degree centrality      | $D_i = \sum_{j=1}^n A_{ij}$ , where $A_{ij}$ is the $ij$ th element of the adjacency matrix. Here, the degree centrality is the special case of strength centrality obtained by setting all the tie weights to 1.                                                                                                      |
| Betweenness centrality | $B_i = \sum_{j,k} \frac{g_{jk}^i}{g_{jk}}$ , where $g_{jk}$ is the number of geodesic paths between node $j$ and node $k$ , and $g_{jk}^i$ is the number of geodesic paths between node $j$ and node $k$ that intersect node $i$ .                                                                                     |
| Eigenvector centrality | $E_i = \frac{1}{\lambda_1} \sum_{j=1}^n A_{ij} E_j$ , where $A_{ij}$ is the $ij$ th element of the adjacency matrix, $E_j$ is the eigenvector centrality of neighbors of node $i$ , and $\lambda_1$ is the leading eigenvalue of the adjacency matrix and that satisfies the eigenvector equation $Ae = \lambda_1 e$ . |

**Table A3** Comparison between fitted GLMMs and LMMs for modeling the association between *Nominated* and claims-based centrality measures without singleton hospitals

|                              | GLMM <sup>a</sup> |       |                | LMM <sup>b</sup> |       |                |
|------------------------------|-------------------|-------|----------------|------------------|-------|----------------|
|                              | Estimate          | SE    | <i>p</i> value | Estimate         | SE    | <i>p</i> value |
| Strength                     | 0.500             | 0.448 | 0.264          | 0.080            | 0.045 | 0.077          |
| Fellowship                   | -1.264            | 1.429 | 0.376          | -0.088           | 0.142 | 0.535          |
| StartPractice35 <sup>c</sup> |                   |       |                | -0.272           | 0.116 | 0.019          |
| Age                          | 0.008             | 0.050 | 0.871          | 0.005            | 0.005 | 0.385          |
| Sex                          | 1.275             | 0.862 | 0.139          | 0.118            | 0.079 | 0.137          |
| RaceWhite                    | 1.546             | 0.856 | 0.071          | 0.126            | 0.092 | 0.169          |
| RaceOthers <sup>d</sup>      |                   |       |                | -0.107           | 0.127 | 0.401          |

<sup>a</sup>The variance of the hospital affiliation random effects was estimated to be 6.142.

<sup>b</sup>The variance of the hospital affiliation random effects was estimated to be 0.037.

<sup>c</sup>Because 1 out of 19 physicians who started his/her career as a physician after 35 years old was nominated by any of the respondents in the dataset on which the Nominated model was estimated, leading to quasi-separation, we excluded the *StartPractice35* variable from this model.

<sup>d</sup>Because 0 out of 13 physicians in the Other Race group were nominated by any of the respondents in the dataset on which the Nominated model was estimated, we combined Asian Race group with the Other Race group in this model.

**Table A3** (Continued) Comparison between fitted GLMMs and LMMs for modeling the association between *Nominated* and claims-based centrality measures without singleton hospitals

|                              | GLMM <sup>a</sup> |       |                | LMM <sup>b</sup> |       |                |
|------------------------------|-------------------|-------|----------------|------------------|-------|----------------|
|                              | Estimate          | SE    | <i>p</i> value | Estimate         | SE    | <i>p</i> value |
| Betweenness                  | 0.105             | 0.440 | 0.812          | 0.018            | 0.042 | 0.672          |
| Fellowship                   | -1.126            | 1.416 | 0.426          | -0.064           | 0.147 | 0.665          |
| StartPractice35 <sup>c</sup> |                   |       |                | -0.217           | 0.113 | 0.055          |
| Age                          | 0.002             | 0.050 | 0.969          | 0.003            | 0.005 | 0.584          |
| Sex                          | 1.231             | 0.854 | 0.149          | 0.108            | 0.080 | 0.180          |
| RaceWhite                    | 1.451             | 0.839 | 0.084          | 0.119            | 0.093 | 0.201          |
| RaceOthers <sup>d</sup>      |                   |       |                | -0.118           | 0.130 | 0.361          |

<sup>a</sup>The variance of the hospital affiliation random effects was estimated to be 5.688.

<sup>b</sup>The variance of the hospital affiliation random effects was estimated to be 0.038.

<sup>c</sup>Because 1 out of 19 physicians who started his/her career as a physician after 35 years old was nominated by any of the respondents in the dataset on which the Nominated model was estimated, leading to quasi-separation, we excluded the *StartPractice35* variable from this model.

<sup>d</sup>Because 0 out of 13 physicians in the Other Race group were nominated by any of the respondents in the dataset on which the Nominated model was estimated, we combined Asian Race group with the Other Race group in this model.

**Table A3** (Continued) Comparison between fitted GLMMs and LMMs for modeling the association between *Nominated* and claims-based centrality measures without singleton hospitals

|                              | GLMM <sup>a</sup> |       |                | LMM <sup>b</sup> |       |                |
|------------------------------|-------------------|-------|----------------|------------------|-------|----------------|
|                              | Estimate          | SE    | <i>p</i> value | Estimate         | SE    | <i>p</i> value |
| Eigenvector                  | -0.146            | 0.595 | 0.806          | -0.018           | 0.045 | 0.685          |
| Fellowship                   | -1.013            | 1.396 | 0.468          | -0.041           | 0.143 | 0.775          |
| StartPractice35 <sup>c</sup> |                   |       |                | -0.216           | 0.113 | 0.056          |
| Age                          | 0.002             | 0.050 | 0.964          | 0.003            | 0.005 | 0.592          |
| Sex                          | 1.223             | 0.849 | 0.149          | 0.108            | 0.080 | 0.176          |
| RaceWhite                    | 1.420             | 0.838 | 0.090          | 0.112            | 0.093 | 0.232          |
| RaceOthers <sup>d</sup>      |                   |       |                | -0.129           | 0.129 | 0.319          |

<sup>a</sup>The variance of the hospital affiliation random effects was estimated to be 5.589.

<sup>b</sup>The variance of the hospital affiliation random effects was estimated to be 0.038.

<sup>c</sup>Because 1 out of 19 physicians who started his/her career as a physician after 35 years old was nominated by any of the respondents in the dataset on which the Nominated model was estimated, leading to quasi-separation, we excluded the *StartPractice35* variable from this model.

<sup>d</sup>Because 0 out of 13 physicians in the Other Race group were nominated by any of the respondents in the dataset on which the Nominated model was estimated, we combined Asian Race group with the Other Race group in this model.

**Table A4** Comparison between fitted LMMs and Poisson GLMMs for modeling the association between *Nomination Sum* and claims-based centrality measures

|                 | LMM <sup>a</sup> |       |                | Poisson GLMM <sup>b</sup> |       |                |
|-----------------|------------------|-------|----------------|---------------------------|-------|----------------|
|                 | Estimate         | SE    | <i>p</i> value | Estimate                  | SE    | <i>p</i> value |
| Strength        | 0.462            | 0.433 | 0.286          | 0.056                     | 0.036 | 0.118          |
| Fellowship      | 1.023            | 1.487 | 0.492          | 0.055                     | 0.110 | 0.618          |
| StartPractice35 | -1.129           | 1.173 | 0.336          | -0.075                    | 0.094 | 0.421          |
| Age             | 0.148            | 0.054 | 0.007          | 0.011                     | 0.004 | 0.011          |
| Sex             | 0.951            | 0.893 | 0.287          | 0.042                     | 0.069 | 0.543          |
| RaceWhite       | -0.592           | 0.937 | 0.528          | -0.045                    | 0.078 | 0.566          |
| RaceOthers      | -0.785           | 1.357 | 0.563          | -0.165                    | 0.113 | 0.145          |

<sup>a</sup>The variance of the hospital affiliation random effects was estimated to be 0.871.

<sup>b</sup>The variance of the hospital affiliation random effects was estimated to be 0.051.

**Table A4** (Continued) Comparison between fitted LMMs and Poisson GLMMs for modeling the association between *Nomination Sum* and claims-based centrality measures

|                 | LMM <sup>a</sup> |       |                | Poisson GLMM <sup>b</sup> |       |                |
|-----------------|------------------|-------|----------------|---------------------------|-------|----------------|
|                 | Estimate         | SE    | <i>p</i> value | Estimate                  | SE    | <i>p</i> value |
| Betweenness     | -0.246           | 0.439 | 0.574          | -0.035                    | 0.040 | 0.383          |
| Fellowship      | 1.287            | 1.526 | 0.399          | 0.090                     | 0.111 | 0.417          |
| StartPractice35 | -0.769           | 1.147 | 0.503          | -0.042                    | 0.092 | 0.643          |
| Age             | 0.138            | 0.054 | 0.012          | 0.010                     | 0.004 | 0.018          |
| Sex             | 0.891            | 0.896 | 0.320          | 0.042                     | 0.069 | 0.542          |
| RaceWhite       | -0.716           | 0.945 | 0.449          | -0.062                    | 0.077 | 0.426          |
| RaceOthers      | -1.024           | 1.367 | 0.454          | -0.179                    | 0.113 | 0.113          |

<sup>a</sup>The variance of the hospital affiliation random effects was estimated to be 1.203.

<sup>b</sup>The variance of the hospital affiliation random effects was estimated to be 0.050.

**Table A4** (Continued) Comparison between fitted LMMs and Poisson GLMMs for modeling the association between *Nomination Sum* and claims-based centrality measures

|                 | LMM <sup>a</sup> |       |                | Poisson GLMM <sup>b</sup> |       |                |
|-----------------|------------------|-------|----------------|---------------------------|-------|----------------|
|                 | Estimate         | SE    | <i>p</i> value | Estimate                  | SE    | <i>p</i> value |
| Eigenvector     | -0.136           | 0.461 | 0.768          | -0.005                    | 0.046 | 0.914          |
| Fellowship      | 1.162            | 1.499 | 0.438          | 0.071                     | 0.109 | 0.513          |
| StartPractice35 | -0.814           | 1.146 | 0.477          | -0.048                    | 0.091 | 0.602          |
| Age             | 0.140            | 0.054 | 0.010          | 0.010                     | 0.004 | 0.016          |
| Sex             | 0.944            | 0.896 | 0.292          | 0.044                     | 0.069 | 0.518          |
| RaceWhite       | -0.699           | 0.946 | 0.460          | -0.057                    | 0.078 | 0.458          |
| RaceOthers      | -0.956           | 1.365 | 0.484          | -0.171                    | 0.113 | 0.129          |

<sup>a</sup>The variance of the hospital affiliation random effects was estimated to be 1.079.

<sup>b</sup>The variance of the hospital affiliation random effects was estimated to be 0.050.

**Table A5** Comparison between fitted LMMs for modeling the association between *Nomination Sum* and claims-based centrality measures with and without singletons hospitals

|                 | LMM with singletons <sup>a</sup> |       |                | LMM without singletons <sup>b</sup> |       |                |
|-----------------|----------------------------------|-------|----------------|-------------------------------------|-------|----------------|
|                 | Estimate                         | SE    | <i>p</i> value | Estimate                            | SE    | <i>p</i> value |
| Strength        | 0.462                            | 0.433 | 0.286          | 0.386                               | 0.518 | 0.457          |
| Fellowship      | 1.023                            | 1.487 | 0.492          | 2.159                               | 1.726 | 0.211          |
| StartPractice35 | -1.129                           | 1.173 | 0.336          | -1.050                              | 1.368 | 0.443          |
| Age             | 0.148                            | 0.054 | 0.007          | 0.132                               | 0.066 | 0.045          |
| Sex             | 0.951                            | 0.893 | 0.287          | 0.622                               | 0.975 | 0.524          |
| RaceWhite       | -0.592                           | 0.937 | 0.528          | -0.660                              | 1.050 | 0.530          |
| RaceOthers      | -0.785                           | 1.357 | 0.563          | -0.653                              | 1.534 | 0.670          |

<sup>a</sup>The variance of the hospital affiliation random effects was estimated to be 0.871.

<sup>b</sup>The variance of the hospital affiliation random effects was estimated to be 0.576.

**Table A5** (Continued) Comparison between fitted LMMs for modeling the association between *Nomination Sum* and claims-based centrality measures with and without singleton hospitals

|                 | LMM with singletons <sup>a</sup> |       |                | LMM without singletons <sup>b</sup> |       |                |
|-----------------|----------------------------------|-------|----------------|-------------------------------------|-------|----------------|
|                 | Estimate                         | SE    | <i>p</i> value | Estimate                            | SE    | <i>p</i> value |
| Betweenness     | -0.246                           | 0.439 | 0.574          | -0.404                              | 0.447 | 0.367          |
| Fellowship      | 1.287                            | 1.526 | 0.399          | 2.767                               | 1.778 | 0.120          |
| StartPractice35 | -0.769                           | 1.147 | 0.503          | -0.681                              | 1.310 | 0.603          |
| Age             | 0.138                            | 0.054 | 0.012          | 0.117                               | 0.064 | 0.069          |
| Sex             | 0.891                            | 0.896 | 0.320          | 0.491                               | 0.971 | 0.613          |
| RaceWhite       | -0.716                           | 0.945 | 0.449          | -0.769                              | 1.057 | 0.467          |
| RaceOthers      | -1.024                           | 1.367 | 0.454          | -0.941                              | 1.536 | 0.540          |

<sup>a</sup>The variance of the hospital affiliation random effects was estimated to be 1.203.

<sup>b</sup>The variance of the hospital affiliation random effects was estimated to be 0.848.

**Table A5** (Continued) Comparison between fitted LMMs for modeling the association between *Nomination Sum* and claims-based centrality measures with and without singleton hospitals

|                 | LMM with singletons <sup>a</sup> |       |                | LMM without singletons <sup>b</sup> |       |                |
|-----------------|----------------------------------|-------|----------------|-------------------------------------|-------|----------------|
|                 | Estimate                         | SE    | <i>p</i> value | Estimate                            | SE    | <i>p</i> value |
| Eigenvector     | -0.136                           | 0.461 | 0.768          | -0.167                              | 0.457 | 0.715          |
| Fellowship      | 1.162                            | 1.499 | 0.438          | 2.425                               | 1.734 | 0.162          |
| StartPractice35 | -0.814                           | 1.146 | 0.477          | -0.711                              | 1.314 | 0.589          |
| Age             | 0.140                            | 0.054 | 0.010          | 0.120                               | 0.064 | 0.062          |
| Sex             | 0.944                            | 0.896 | 0.292          | 0.546                               | 0.974 | 0.575          |
| RaceWhite       | -0.699                           | 0.946 | 0.460          | -0.736                              | 1.064 | 0.489          |
| RaceOthers      | -0.956                           | 1.365 | 0.484          | -0.837                              | 1.539 | 0.586          |

<sup>a</sup>The variance of the hospital affiliation random effects was estimated to be 1.079.

<sup>b</sup>The variance of the hospital affiliation random effects was estimated to be 0.785.



**Table A6** Association between pooled survey responses and measures of prominence

|                             | Estimate <sup>a</sup> | SE    | <i>p</i> value |
|-----------------------------|-----------------------|-------|----------------|
| Question 2 indicator (Ques) | -0.423                | 0.751 | 0.573          |
| Nominated                   | 1.688                 | 1.080 | 0.118          |
| NominationSum               | 0.091                 | 0.054 | 0.093          |
| Strength                    | -0.068                | 0.273 | 0.802          |
| Eigenvector                 | -0.481                | 0.323 | 0.136          |
| Betweenness                 | 0.912                 | 0.571 | 0.110          |
| Fellowship                  | 0.006                 | 0.588 | 0.992          |
| StartPractice35             | 0.405                 | 0.465 | 0.384          |
| Age                         | -0.036                | 0.021 | 0.093          |
| Sex                         | 0.280                 | 0.344 | 0.415          |
| RaceOthers                  | -0.315                | 0.511 | 0.538          |
| RaceWhite                   | -0.425                | 0.361 | 0.239          |
| Ques:Nominated              | -0.294                | 1.230 | 0.811          |
| Ques:NominationSum          | -0.079                | 0.066 | 0.233          |
| Ques:Strength               | -0.038                | 0.334 | 0.909          |
| Ques:Eigenvector            | -0.489                | 0.832 | 0.556          |
| Ques:Betweenness            | -0.614                | 0.655 | 0.349          |

<sup>a</sup>The variance of the hospital affiliation random effects was estimated to be 0.000000028.

**Table A7** Association between claims-based betweenness centrality and survey-based measures of physician prominence

|                              | Nominated <sup>a</sup> |       |                | Nomination Sum <sup>b</sup> |       |                |
|------------------------------|------------------------|-------|----------------|-----------------------------|-------|----------------|
|                              | Estimate               | SE    | <i>p</i> value | Estimate                    | SE    | <i>p</i> value |
| Betweenness                  | 0.105                  | 0.440 | 0.812          | -0.246                      | 0.439 | 0.574          |
| Fellowship                   | -1.126                 | 1.416 | 0.426          | 1.287                       | 1.526 | 0.399          |
| StartPractice35 <sup>c</sup> |                        |       |                | -0.769                      | 1.147 | 0.503          |
| Age                          | 0.002                  | 0.050 | 0.969          | 0.138                       | 0.054 | 0.012          |
| Sex                          | 1.231                  | 0.854 | 0.149          | 0.891                       | 0.896 | 0.320          |
| RaceWhite                    | 1.451                  | 0.839 | 0.084          | -0.716                      | 0.945 | 0.449          |
| RaceOthers <sup>d</sup>      |                        |       |                | -1.024                      | 1.367 | 0.454          |

<sup>a</sup>The variance of the hospital affiliation random effects was estimated to be 5.688.

<sup>b</sup>The variance of the hospital affiliation random effects was estimated to be 1.203.

<sup>c</sup>Because 1 out of 19 physicians who started his/her career as a physician after 35 years old was nominated by any of the respondents in the dataset on which the Nominated model was estimated, leading to quasi-separation, we excluded the *StartPractice35* variable from this model.

<sup>d</sup>Because 0 out of 13 physicians in the Other Race group were nominated by any of the respondents in the dataset on which the Nominated model was estimated, we combined Asian Race group with the Other Race group in this model.

**Table A8** Association between claims-based eigenvector centrality and survey-based measures of physician prominence

|                              | Nominated <sup>a</sup> |       |                | Nomination Sum <sup>b</sup> |       |                |
|------------------------------|------------------------|-------|----------------|-----------------------------|-------|----------------|
|                              | Estimate               | SE    | <i>p</i> value | Estimate                    | SE    | <i>p</i> value |
| Eigenvector                  | -0.146                 | 0.595 | 0.806          | -0.136                      | 0.461 | 0.768          |
| Fellowship                   | -1.013                 | 1.396 | 0.468          | 1.162                       | 1.499 | 0.438          |
| StartPractice35 <sup>c</sup> |                        |       |                | -0.814                      | 1.146 | 0.477          |
| Age                          | 0.002                  | 0.050 | 0.964          | 0.140                       | 0.054 | 0.010          |
| Sex                          | 1.223                  | 0.849 | 0.149          | 0.944                       | 0.896 | 0.292          |
| RaceWhite                    | 1.420                  | 0.838 | 0.090          | -0.699                      | 0.946 | 0.460          |
| RaceOthers <sup>d</sup>      |                        |       |                | -0.956                      | 1.365 | 0.484          |

<sup>a</sup>The variance of the hospital affiliation random effects was estimated to be 5.589.

<sup>b</sup>The variance of the hospital affiliation random effects was estimated to be 1.079.

<sup>c</sup>Because 1 out of 19 physicians who started his/her career as a physician after 35 years old was nominated by any of the respondents in the dataset on which the Nominated model was estimated, leading to quasi-separation, we excluded the *StartPractice35* variable from this model.

<sup>d</sup>Because 0 out of 13 physicians in the Other Race group were nominated by any of the respondents in the dataset on which the Nominated model was estimated, we combined Asian Race group with the Other Race group in this model.
